# Supplementary material
Source: PubMed Central journal article supplement (PMC11426109)
Supplement: NIHMS2021660-supplement-supplementary_table_1.pdf [file NIHMS2021660-supplement-supplementary_table_1.pdf]

Supplemental Table 1. Tagging SNPs for class I and class II *HLA* alleles on the Illumina 1M genotyping chip ( $r^2 \leq 0.090$ ; continuation of Table 2).

| HLA               | SNP        | r2    | HLA_FRQ | SNP_FRQ |
|-------------------|------------|-------|---------|---------|
| <i>B*45:01</i>    | rs2523477  | 0.087 | 0.01    | 0.08    |
| <i>B*35:12</i>    | rs3093561  | 0.086 | 0.001   | 0.01    |
| <i>DPB1*15:01</i> | rs11751659 | 0.083 | 0.01    | 0.11    |
| <i>A*03:02</i>    | rs2523447  | 0.08  | 0.004   | 0.04    |
| <i>A*34:01</i>    | rs6904120  | 0.079 | 0.01    | 0.06    |
| <i>B*54:01</i>    | rs3819284  | 0.077 | 0.002   | 0.02    |
| <i>DPA1*02:02</i> | rs1431403  | 0.077 | 0.06    | 0.34    |
| <i>DRB1*04:08</i> | rs17501267 | 0.077 | 0.01    | 0.04    |
| <i>DQB1*03:04</i> | rs17501267 | 0.072 | 0.003   | 0.04    |
| <i>C*08:01</i>    | rs2524083  | 0.071 | 0.01    | 0.12    |
| <i>B*15:21</i>    | rs6902544  | 0.069 | 0.001   | 0.01    |
| <i>A*30:04</i>    | rs2857449  | 0.068 | 0.001   | 0.01    |
| <i>DRB1*08:04</i> | rs7356880  | 0.066 | 0.003   | 0.03    |
| <i>A*66:01</i>    | rs9261316  | 0.064 | 0.004   | 0.05    |
| <i>DPA1*01:04</i> | rs11751659 | 0.062 | 0.01    | 0.11    |
| <i>A*34:02</i>    | rs16895214 | 0.061 | 0.003   | 0.02    |
| <i>DRB1*04:03</i> | rs3763305  | 0.061 | 0.01    | 0.06    |
| <i>B*39:01</i>    | rs6910087  | 0.06  | 0.01    | 0.16    |
| <i>B*73:01</i>    | rs2071288  | 0.06  | 0.001   | 0.01    |
| <i>A*01:02</i>    | rs6902544  | 0.059 | 0.001   | 0.01    |
| <i>C*16:04</i>    | rs7747738  | 0.059 | 0.002   | 0.03    |
| <i>DRB1*11:04</i> | rs17208888 | 0.059 | 0.01    | 0.07    |
| <i>B*35:02</i>    | rs2073724  | 0.058 | 0.01    | 0.08    |
| <i>B*15:03</i>    | rs7742033  | 0.054 | 0.005   | 0.02    |
| <i>DQB1*05:04</i> | rs28732193 | 0.054 | 0.001   | 0.02    |
| <i>DRB1*12:01</i> | rs3129888  | 0.054 | 0.01    | 0.10    |
| <i>B*58:02</i>    | rs6902738  | 0.053 | 0.002   | 0.01    |
| <i>B*48:01</i>    | rs3093668  | 0.052 | 0.003   | 0.02    |
| <i>DRB1*11:03</i> | rs17208888 | 0.052 | 0.004   | 0.07    |
| <i>B*38:02</i>    | rs2233954  | 0.049 | 0.004   | 0.05    |
| <i>B*42:02</i>    | rs9468942  | 0.047 | 0.001   | 0.01    |
| <i>DRB1*04:07</i> | rs4947332  | 0.047 | 0.01    | 0.02    |
| <i>A*68:03</i>    | rs4711248  | 0.046 | 0.001   | 0.01    |
| <i>A*24:07</i>    | rs2017525  | 0.044 | 0.005   | 0.10    |
| <i>B*15:10</i>    | rs3093542  | 0.043 | 0.002   | 0.02    |
| <i>B*15:13</i>    | rs9357117  | 0.041 | 0.001   | 0.02    |

|                   |            |       |        |      |
|-------------------|------------|-------|--------|------|
| <i>A*36:01</i>    | rs2747419  | 0.04  | 0.001  | 0.02 |
| <i>DPB1*26:01</i> | rs6930052  | 0.04  | 0.004  | 0.05 |
| <i>C*04:03</i>    | rs2269713  | 0.039 | 0.003  | 0.04 |
| <i>DPB1*16:01</i> | rs3129270  | 0.039 | 0.01   | 0.12 |
| <i>DRB1*08:02</i> | rs9501626  | 0.039 | 0.004  | 0.09 |
| <i>DRB1*08:03</i> | rs2395148  | 0.039 | 0.003  | 0.03 |
| <i>B*51:02</i>    | rs3093561  | 0.038 | 0.001  | 0.01 |
| <i>DRB1*16:02</i> | rs9270986  | 0.034 | 0.003  | 0.09 |
| <i>B*15:18</i>    | rs16899178 | 0.033 | 0.003  | 0.05 |
| <i>DQB1*04:01</i> | rs9368704  | 0.033 | 0.003  | 0.01 |
| <i>B*35:05</i>    | rs2073724  | 0.032 | 0.003  | 0.08 |
| <i>DPB1*20:01</i> | rs3129270  | 0.032 | 0.004  | 0.12 |
| <i>C*15:04</i>    | rs16899178 | 0.031 | 0.002  | 0.05 |
| <i>DPA1*03:01</i> | rs9468559  | 0.03  | 0.01   | 0.02 |
| <i>B*35:17</i>    | rs3093561  | 0.029 | 0.001  | 0.01 |
| <i>DPB1*19:01</i> | rs3128935  | 0.029 | 0.003  | 0.06 |
| <i>B*15:08</i>    | rs9357117  | 0.027 | 0.001  | 0.02 |
| <i>B*15:02</i>    | rs2395148  | 0.025 | 0.003  | 0.03 |
| <i>A*02:03</i>    | rs9368704  | 0.024 | 0.003  | 0.01 |
| <i>DPB1*28:01</i> | rs9469378  | 0.024 | 0.001  | 0.05 |
| <i>B*27:04</i>    | rs3819299  | 0.023 | 0.001  | 0.06 |
| <i>B*15:26</i>    | rs3763288  | 0.021 | 0.002  | 0.09 |
| <i>B*27:07</i>    | rs3093671  | 0.021 | 0.001  | 0.03 |
| <i>B*51:05</i>    | rs3093665  | 0.021 | 0.0004 | 0.02 |
| <i>DPB1*85:01</i> | rs9468559  | 0.021 | 0.0005 | 0.02 |
| <i>A*02:11</i>    | rs16897572 | 0.019 | 0.003  | 0.08 |
| <i>B*56:04</i>    | rs3819284  | 0.019 | 0.0004 | 0.02 |
| <i>A*11:03</i>    | rs11754099 | 0.018 | 0.0005 | 0.03 |
| <i>B*15:15</i>    | rs2021783  | 0.018 | 0.0002 | 0.01 |
| <i>B*35:14</i>    | rs2517623  | 0.018 | 0.0002 | 0.01 |
| <i>B*40:23</i>    | rs2021783  | 0.018 | 0.0002 | 0.01 |
| <i>B*56:03</i>    | rs2021783  | 0.018 | 0.0002 | 0.01 |
| <i>DPB1*48:01</i> | rs2021783  | 0.018 | 0.0002 | 0.01 |
| <i>B*15:25</i>    | rs2859110  | 0.017 | 0.001  | 0.01 |
| <i>B*51:06</i>    | rs6903896  | 0.017 | 0.001  | 0.03 |
| <i>B*51:08</i>    | rs7747738  | 0.017 | 0.0005 | 0.03 |
| <i>B*78:01</i>    | rs7747738  | 0.017 | 0.0005 | 0.03 |
| <i>DPB1*18:01</i> | rs448733   | 0.017 | 0.002  | 0.05 |
| <i>DRB1*11:08</i> | rs9469024  | 0.017 | 0.0002 | 0.01 |
| <i>DRB1*14:02</i> | rs7761890  | 0.017 | 0.002  | 0.02 |
| <i>DRB1*14:06</i> | rs12055568 | 0.017 | 0.001  | 0.03 |

|                   |            |       |        |      |
|-------------------|------------|-------|--------|------|
| <i>B*15:07</i>    | rs17493811 | 0.016 | 0.001  | 0.04 |
| <i>B*44:04</i>    | rs3130666  | 0.016 | 0.0004 | 0.02 |
| <i>DPA1*04:01</i> | rs7763822  | 0.016 | 0.003  | 0.04 |
| <i>DRB1*11:02</i> | rs28366191 | 0.016 | 0.003  | 0.05 |
| <i>DRB1*14:15</i> | rs3129727  | 0.016 | 0.0003 | 0.02 |
| <i>A*80:01</i>    | rs2516312  | 0.015 | 0.0005 | 0.01 |
| <i>B*15:24</i>    | rs3895681  | 0.015 | 0.0004 | 0.01 |
| <i>B*39:08</i>    | rs4711250  | 0.015 | 0.0002 | 0.01 |
| <i>C*12:04</i>    | rs28732150 | 0.015 | 0.001  | 0.05 |
| <i>C*18:01</i>    | rs7759127  | 0.015 | 0.002  | 0.12 |
| <i>A*31:12</i>    | rs3895681  | 0.014 | 0.0002 | 0.01 |
| <i>B*15:16</i>    | rs3218822  | 0.014 | 0.001  | 0.02 |
| <i>B*40:09</i>    | rs3093561  | 0.014 | 0.0002 | 0.01 |
| <i>B*81:01</i>    | rs9263582  | 0.014 | 0.001  | 0.05 |
| <i>A*11:02</i>    | rs2286404  | 0.013 | 0.001  | 0.06 |
| <i>DPB1*21:01</i> | rs2021783  | 0.013 | 0.001  | 0.01 |
| <i>DRB1*08:06</i> | rs9469063  | 0.013 | 0.0004 | 0.03 |
| <i>A*69:01</i>    | rs2517922  | 0.012 | 0.001  | 0.05 |
| <i>B*35:43</i>    | rs9366775  | 0.012 | 0.0004 | 0.03 |
| <i>DPB1*40:01</i> | rs6930217  | 0.012 | 0.001  | 0.01 |
| <i>DRB1*13:04</i> | rs3130666  | 0.012 | 0.0003 | 0.02 |
| <i>DRB1*14:07</i> | rs11575840 | 0.012 | 0.0002 | 0.02 |
| <i>B*39:09</i>    | rs2071288  | 0.011 | 0.0005 | 0.01 |
| <i>DPB1*31:01</i> | rs9368704  | 0.011 | 0.0003 | 0.01 |
| <i>DRB1*04:06</i> | rs9391637  | 0.011 | 0.001  | 0.01 |
| <i>DRB1*11:06</i> | rs11754099 | 0.011 | 0.0005 | 0.03 |
| <i>DRB1*14:05</i> | rs3129727  | 0.011 | 0.0002 | 0.02 |
| <i>B*18:02</i>    | rs12662077 | 0.01  | 0.0005 | 0.05 |
| <i>B*50:02</i>    | rs915653   | 0.01  | 0.0004 | 0.02 |
| <i>C*04:10</i>    | rs3819284  | 0.01  | 0.0002 | 0.02 |
| <i>DPA1*01:05</i> | rs9468942  | 0.01  | 0.001  | 0.01 |
| <i>DRB1*04:11</i> | rs3817964  | 0.01  | 0.001  | 0.06 |
| <i>DRB1*13:05</i> | rs17208888 | 0.01  | 0.001  | 0.07 |
| <i>A*24:03</i>    | rs3093665  | 0.009 | 0.002  | 0.02 |
| <i>B*07:04</i>    | rs3104402  | 0.009 | 0.0002 | 0.02 |
| <i>B*15:04</i>    | rs9391714  | 0.009 | 0.0003 | 0.03 |
| <i>B*15:30</i>    | rs9405015  | 0.009 | 0.0002 | 0.02 |
| <i>B*35:21</i>    | rs7761890  | 0.009 | 0.0002 | 0.02 |
| <i>C*07:26</i>    | rs9296020  | 0.009 | 0.0003 | 0.01 |
| <i>A*01:03</i>    | rs6911622  | 0.008 | 0.0005 | 0.06 |
| <i>A*31:03</i>    | rs6457694  | 0.008 | 0.0002 | 0.02 |

|                   |            |       |        |      |
|-------------------|------------|-------|--------|------|
| <i>B*15:06</i>    | rs9500864  | 0.008 | 0.0002 | 0.02 |
| <i>B*39:10</i>    | rs9469093  | 0.008 | 0.001  | 0.02 |
| <i>DPB1*35:01</i> | rs6937061  | 0.008 | 0.0003 | 0.04 |
| <i>DPB1*45:01</i> | rs6937061  | 0.008 | 0.0003 | 0.04 |
| <i>A*24:01</i>    | rs805284   | 0.007 | 0.0002 | 0.03 |
| <i>A*24:10</i>    | rs3129727  | 0.007 | 0.0003 | 0.02 |
| <i>A*26:08</i>    | rs2301751  | 0.007 | 0.0004 | 0.05 |
| <i>B*15:09</i>    | rs16899178 | 0.007 | 0.0004 | 0.05 |
| <i>B*27:03</i>    | rs9366775  | 0.007 | 0.0004 | 0.03 |
| <i>B*57:02</i>    | rs9296020  | 0.007 | 0.0004 | 0.01 |
| <i>B*57:03</i>    | rs9468559  | 0.007 | 0.001  | 0.02 |
| <i>C*03:06</i>    | rs2517490  | 0.007 | 0.0003 | 0.02 |
| <i>DPB1*33:01</i> | rs2517490  | 0.007 | 0.0003 | 0.02 |
| <i>DRB1*04:10</i> | rs6902544  | 0.007 | 0.0004 | 0.01 |
| <i>A*66:02</i>    | rs6906662  | 0.006 | 0.0002 | 0.03 |
| <i>B*39:02</i>    | rs7761890  | 0.006 | 0.0003 | 0.02 |
| <i>B*40:05</i>    | rs16899178 | 0.006 | 0.0003 | 0.05 |
| <i>C*02:06</i>    | rs3093671  | 0.006 | 0.0002 | 0.03 |
| <i>C*04:04</i>    | rs2074475  | 0.006 | 0.0003 | 0.02 |
| <i>DPB1*34:01</i> | rs3130609  | 0.006 | 0.0003 | 0.04 |
| <i>DPB1*81:01</i> | rs9469063  | 0.006 | 0.0002 | 0.03 |
| <i>DQB1*03:05</i> | rs11759238 | 0.006 | 0.0003 | 0.02 |
| <i>A*02:16</i>    | rs11754099 | 0.005 | 0.0003 | 0.03 |
| <i>A*11:05</i>    | rs3025642  | 0.005 | 0.0002 | 0.04 |
| <i>B*40:10</i>    | rs35759989 | 0.005 | 0.0002 | 0.03 |
| <i>A*36:03</i>    | rs4713310  | 0.004 | 0.0002 | 0.05 |
| <i>B*15:05</i>    | rs6903896  | 0.004 | 0.0003 | 0.03 |
| <i>DPB1*30:01</i> | rs2736182  | 0.004 | 0.0002 | 0.05 |
| <i>DRB1*03:04</i> | rs2517623  | 0.004 | 0.0002 | 0.01 |
| <i>A*02:17</i>    | rs1233400  | 0.003 | 0.0005 | 0.16 |
| <i>B*15:27</i>    | rs3817964  | 0.003 | 0.0002 | 0.06 |
| <i>C*03:05</i>    | rs3093561  | 0.003 | 0.0002 | 0.01 |
| <i>C*04:07</i>    | rs7774197  | 0.003 | 0.0002 | 0.05 |
| <i>DPB1*22:01</i> | rs9368704  | 0.003 | 0.0003 | 0.01 |
| <i>DRB1*04:09</i> | rs9267658  | 0.003 | 0.0002 | 0.06 |
| <i>DRB1*04:37</i> | rs7742120  | 0.003 | 0.0002 | 0.07 |
